# Supplementary material
Source: publisher site journal article supplement (https://www.dovepress.com/article/281985)
Supplement: Supplementary file 1 [file get_supplementary_file.php]

**Supplementary File. Survey**

**IEXPAC PROJECT. SURVEY TO PATIENTS WITH DIFFERENT CHRONIC DISEASES ABOUT THEIR EXPERIENCE WITH HEALTH CARE**

**NOTE: THIS SURVEY DOES NOT CONTAIN ANY DATA THAT CAN IDENTIFY THE PERSON WHO COMPLETES IT, SO YOUR ANONYMITY IS GUARANTEED, PURSUANT TO THE DATA PROTECTION ACT (SPANISH LOPD).**

**QUESTIONS**

**1. GENERAL QUESTIONS**

**1.1. Gender and age**

| Male | ❑ |
| --- | --- |
| Female | ❑ |
| Age  ------------------- Years |  |

**1.2. In which region of Spain do you live?**

_________________

**1.3. For your health care, are you followed in a region different where you live?**

| Yes | ❑ |
| --- | --- |
| No | ❑ |

**1.4 Education level (tick only one, the highest reached)**

| No schooling | ❑ |
| --- | --- |
| Primary education | ❑ |
| Secondary education | ❑ |
| Vocational training | ❑ |
| Higher education (diploma, university degree) | ❑ |
| Other | ❑ |

**1.5. Current occupational status (tick only the one that best reflects your current situation)**

| Student | ❑ |
| --- | --- |
| Active worker (currently I am working) | ❑ |
| Unemployed | ❑ |
| Housekeeper | ❑ |
| Retired | ❑ |
| On leave due to your chronic disease/s | ❑ |
| Permanent handicap | ❑ |

**1.6. Are you affiliated to a patients association?**

| Yes | ❑ |
| --- | --- |
| No | ❑ |

**1.7. How are you able to perform the following activities?**

**Please tick the answer that apply to you in the following items (select one answer per item; please respond to all the items).**

***Wheelchair: Score this item only if Ambulation is coded “1” and you are trained in wheelchair use (if not, leave it blank)**

|  | **Unable to perform task** | **Attempt but unsafe** | **Moderate help required** | **Minimal help required** | **Fully independent** |
| --- | --- | --- | --- | --- | --- |
| Personal hygiene |  |  |  |  |  |
| Bathing self |  |  |  |  |  |
| Feeding |  |  |  |  |  |
| Toilet |  |  |  |  |  |
| Stair climbing |  |  |  |  |  |
| Dressing |  |  |  |  |  |
| Bowel control |  |  |  |  |  |
| Bladder control |  |  |  |  |  |
| Chair/bed transfers |  |  |  |  |  |
| Ambulation |  |  |  |  |  |
| Wheelchair* |  |  |  |  |  |

**2. QUESTIONS ON HOW YOUR DISEASES ARE BEING FOLLOWED-UP**

**2.1. Which of the following physicians have seen you (either at the hospital or at an outpatient clinic / primary care center) in the last year? (Tick all the different physicians that have seen you)**

| Primary care physician | ❑ |
| --- | --- |
| Internal medicine specialist | ❑ |
| Hospital emergency room | ❑ |
| Cardiologist | ❑ |
| Vascular specialist (circulation) | ❑ |
| Respiratory diseases specialist | ❑ |
| Digestive system specialist | ❑ |
| Kidney disease specialist | ❑ |
| Urologist | ❑ |
| Rheumatologist | ❑ |
| Traumatology specialist | ❑ |
| Specialist in rehabilitation | ❑ |
| Gynecologist | ❑ |
| Endocrinologist | ❑ |
| Infectious diseases physician | ❑ |
| Psychiatric or psychologist | ❑ |
| Dermatologist | ❑ |
| Hematologist | ❑ |
| Oncologist | ❑ |
| Ophthalmologist | ❑ |
| Otorhinolaryngologist | ❑ |
| Allergy specialist | ❑ |
| Surgeon | ❑ |
| Other | ❑ |

**2.2. In the last year, have you visited any of these centers to monitor/follow your illnesses? If the answer is "Yes" please write the approximate number of times you have attended in the last year (included for consultations, diagnostic tests or analysis).**

|  | **Yes** | **No** | **If “Yes”, number of times** |
| --- | --- | --- | --- |
| Primary care | ❑ | ❑ |  |
| Outpatient specialty clinic out of a hospital | ❑ | ❑ |  |
| Outpatient clinic in a hospital | ❑ | ❑ |  |
| Emergency room department | ❑ | ❑ |  |

**2.3. Think in general about the specialists who follow your illnesses**

**Is usually the same specialist who follows you for a specific disease (for example, if you are seen by a cardiologist, is it always or almost always the same cardiologist)? Or do you happen to be seen by different doctors for the same disease (for example, is one cardiologist at one appointment and other in the next appointment)? (Check only one, the most frequent)**

| It is the same specialist, in general (my physicians are usually the same) | ❑ |
| --- | --- |
| Sometimes, I am seen by different doctors (one appointment a doctors sees me and the next time is another different doctor who sees me) | ❑ |
| Frequently, I am seen by different doctors | ❑ |

**2.4. Besides physicians, are you regularly followed by a nurse? (You can tick more than one options)**

| No, I am not being regularly followed-up by a nurse | ❑ |
| --- | --- |
| Yes, in the primary care center | ❑ |
| Yes, in the hospital | ❑ |
| Yes, in other type of center | ❑ |

**2.5. For your health care, do you have help from family / friends or professionals? Tick only one, the one that best define your situation**

| I do not have any help, I take care of myself | ❑ |
| --- | --- |
| My family helps me in my health care | ❑ |
| Others (friends, social services) help me in my health care | ❑ |
| I have a professional caregiver (one paid by me) | ❑ |

**2.6. Are you regularly receiving…**

1. home assistance? (i.e. a health care professional –physician, nurse, etc. – goes regularly to your home to check your health status or to administer you a therapy)

| Yes | ❑ |
| --- | --- |
| No | ❑ |

2. assistance from the social services?

| Yes | ❑ |
| --- | --- |
| No | ❑ |

3. help from NGO (Non-government organization)?

| Yes | ❑ |
| --- | --- |
| No | ❑ |

4. help from Patients Association?

| Yes | ❑ |
| --- | --- |
| No | ❑ |

**2.7. How many different medicines are you taking?**

**Examples:**

- **If you take 1 medicine twice a day and 1 medicine three times a day, this counts two different medicines**
- **If you take two different medicines for one disease, one medicine for other disease, and you also inject 1 medicine (like insulin or other), this counts 4 different medicines**

**Number of medicines ________**

**2.8. Are you receiving any treatment that is administered as subcutaneous injections (in the skin) or intravenous?**

| Yes | ❑ |
| --- | --- |
| No | ❑ |

**2.9. How many times do you need to take/administer your medicines per day?**

| Only one per day (I can take/administer all my medicines more or less at the same time) | ❑ |
| --- | --- |
| Twice per day (I need to take/administer all my medicines at 2 different times each day) | ❑ |
| Three times a day (I need to take/administer all my medicines at 3 different times each day) | ❑ |
| Four or more times a day | ❑ |

**2.10. Think about the information that health professionals (doctors, nurses, pharmacists) have given to you directly. How much information do you think you have been given about ...? (check one option for each line)**

|  | **Enough information** | **Little information** | **No information** |
| --- | --- | --- | --- |
| The characteristics of the disease / diseases you suffer | ❑ | ❑ | ❑ |
| The medications you have to take (how to take them, side effects, precautions…) | ❑ | ❑ | ❑ |
| The lifestyle that is convenient to you (exercise, types of exercise, etc.) | ❑ | ❑ | ❑ |
| The kind of food that is convenient to you | ❑ | ❑ | ❑ |

**2.11. Do you usually receive information on the characteristics of drugs (what are they for, how to take them, etc.) in the pharmacy?**

| Yes | ❑ |
| --- | --- |
| No | ❑ |

**2.12. Do you frequently search for information about your diseases and treatments in sources other than the physician, the nurse or the pharmacist (for example, websites, patient associations, or other? Please tick “Yes” or “No” in each line**

|  | **Yes** | **No** |
| --- | --- | --- |
| The characteristics of the disease / diseases you suffer | ❑ | ❑ |
| The medications you have to take (how to take them, side effects, precautions…) | ❑ | ❑ |
| The lifestyle that is convenient to you (exercise, types of exercise, etc.) | ❑ | ❑ |
| The kind of food that is convenient to you | ❑ | ❑ |

**2.13. If your answer to at least one of the previous question was “Yes”, tick all the sources from where you have obtained information (you can select more than one)**

- Websites specialized in medicine or blogs related to disease or health
- Websites with general information (not specialized)
- General information media (press, TV, or radio)
- Brochures for patients
- Patient associations
- Other patients
- Friends or relatives

**2.14. How do you rate the level of information you have on…?**

|  | **Well informed** | **Somewhat informed** | **Poorly informed** | **Not informed at all** |
| --- | --- | --- | --- | --- |
| The characteristics of the disease / diseases you suffer | ❑ | ❑ | ❑ | ❑ |
| The medications you have to take (how to take them, side effects, precautions…) | ❑ | ❑ | ❑ | ❑ |
| The lifestyle that is convenient to you (exercise, types of exercise, etc.) | ❑ | ❑ | ❑ | ❑ |
| The kind of food that is convenient to you | ❑ | ❑ | ❑ | ❑ |

**3. STATEMENTS ON YOUR EXPERIENCE AS A PATIENT WITH CHRONIC DISEASES (IEXPAC)**

**NOTE: In order to evaluate correctly these statements, you must answer all the statements from 1 to 11. The last statement (number 12) should only be answered if you have been admitted to a hospital in the last three years**

**Based on your experience as a patient with chronic diseases, answer the following statements by showing the frequency these situations occur (tick only one).**

**There are no right or wrong answers, what matters is your personal experience. All questions refer to your experience in the last 6 months**

1.They respect my lifestyle.

The professionals who serve me listen to me, ask me about my needs, habits and preferences to adapt my care plan and treatment.

| Always | Mostly | Sometimes | Hardly ever | Never |
| --- | --- | --- | --- | --- |
| ❑ | ❑ | ❑ | ❑ | ❑ |

2. They are coordinated to offer good health care to me.

Health and social services are coordinated to improve my wellbeing and quality of life in my environment (family, neighborhood, village, city).

| Always | Mostly | Sometimes | Hardly ever | Never |
| --- | --- | --- | --- | --- |
| ❑ | ❑ | ❑ | ❑ | ❑ |

3. They help me to get information from the Internet

The professionals who serve me inform me about websites and Internet forums that I can trust to better understand my illness, its treatment and the consequences that may have on my life.

| Always | Mostly | Sometimes | Hardly ever | Never |
| --- | --- | --- | --- | --- |
| ❑ | ❑ | ❑ | ❑ | ❑ |

4. Now I can take care of me better

I feel that my confidence has improved in my ability to take care of me, managing my health problems and maintaining my autonomy.

| Always | Mostly | Sometimes | Hardly ever | Never |
| --- | --- | --- | --- | --- |
| ❑ | ❑ | ❑ | ❑ | ❑ |

5. They ask me and help me to follow my treatment plan

I regularly check with the professionals who care for me the fulfillment of my health care plan and treatment.

| Always | Mostly | Sometimes | Hardly ever | Never |
| --- | --- | --- | --- | --- |
| ❑ | ❑ | ❑ | ❑ | ❑ |

6. We set goals for a healthy life and better control my illness

I have agreed with the professionals who take care of me specific objectives on diet, exercise and how to take medication to control my illness better.

| Always | Mostly | Sometimes | Hardly ever | Never |
| --- | --- | --- | --- | --- |
| ❑ | ❑ | ❑ | ❑ | ❑ |

7. I can use Internet and my mobile phone to consult my medical records

I can check my records, my test results, appointments scheduled and access other services via the Internet or my Health Service mobile app

| Always | Mostly | Sometimes | Hardly ever | Never |
| --- | --- | --- | --- | --- |
| ❑ | ❑ | ❑ | ❑ | ❑ |

8. They make sure that I take medication correctly

Professionals who work with me reviewed all medications I take, how I take them and which the results are.

| Always | Mostly | Sometimes | Hardly ever | Never |
| --- | --- | --- | --- | --- |
| ❑ | ❑ | ❑ | ❑ | ❑ |

9. They worry about my welfare

Professionals who take care of me care about my quality of life and I see them committed to my welfare.

| Always | Mostly | Sometimes | Hardly ever | Never |
| --- | --- | --- | --- | --- |
| ❑ | ❑ | ❑ | ❑ | ❑ |

10. I have been informed on the health and social resources that can help me

The professionals who treat me inform me about health and social resources available (in my neighborhood, city or town) that I can use to improve my health problems and to take care of me better.

| Always | Mostly | Sometimes | Hardly ever | Never |
| --- | --- | --- | --- | --- |
| ❑ | ❑ | ❑ | ❑ | ❑ |

11.They encourage me to talk to other patients

The professionals who treat me encourage me to participate in groups of patients to share information and experiences on how to care for and improve our health.

| Always | Mostly | Sometimes | Hardly ever | Never |
| --- | --- | --- | --- | --- |
| ❑ | ❑ | ❑ | ❑ | ❑ |

If you have been admitted to hospital in the last 3 years, please answer the following question:

12. They care about me when he comes home after being in the hospital

After discharge, they have called or visited me at home to see how I was and what care did I need.

| Always | Mostly | Sometimes | Hardly ever | Never |
| --- | --- | --- | --- | --- |
| ❑ | ❑ | ❑ | ❑ | ❑ |

**4. QUESTIONS ABOUT HOW YOU TAKE THE MEDICATION**

In order for these questions to be interpreted correctly, you must answer all the questions. Check "Yes" or "No" for each question

|  | **Yes** | **No** |
| --- | --- | --- |
| Do you ever forget to take your medicines? | ❑ | ❑ |
| Do you take your medicines at the scheduled hours? | ❑ | ❑ |
| When you feel better, do you sometimes stop taking your medicine? | ❑ | ❑ |
| Sometimes if you feel worse when you take your medicine, do you stop taking it? | ❑ | ❑ |
| Have you ever stopped taking one medication due to what the information for patients sheet says? | ❑ | ❑ |

**5. QUESTIONS ABOUT YOUR BELIEFS ON YOUR MEDICINES**

**NOTE: In order to evaluate correctly these statements, you must answer all the statements.**

**Think about how your case is in general and what you think about medications in general, and for each sentence mark your degree of agreement**

**There are no right or wrong answers.**

1. My health, at present, depends on my medicines

| Completely disagree | Disagree | Neutral | Agree | Completely agree |
| --- | --- | --- | --- | --- |
| ❑ | ❑ | ❑ | ❑ | ❑ |

2. My life would be impossible without my medicines

| Completely disagree | Disagree | Neutral | Agree | Completely agree |
| --- | --- | --- | --- | --- |
| ❑ | ❑ | ❑ | ❑ | ❑ |

3. Without my medicines I would become very ill

| Completely disagree | Disagree | Neutral | Agree | Completely agree |
| --- | --- | --- | --- | --- |
| ❑ | ❑ | ❑ | ❑ | ❑ |

4. My health in the future will depend on my medicines

| Completely disagree | Disagree | Neutral | Agree | Completely agree |
| --- | --- | --- | --- | --- |
| ❑ | ❑ | ❑ | ❑ | ❑ |

5. My medicines protect me from becoming worse

| Completely disagree | Disagree | Neutral | Agree | Completely agree |
| --- | --- | --- | --- | --- |
| ❑ | ❑ | ❑ | ❑ | ❑ |

6. Having to take medicines worries me

| Completely disagree | Disagree | Neutral | Agree | Completely agree |
| --- | --- | --- | --- | --- |
| ❑ | ❑ | ❑ | ❑ | ❑ |

7. I sometimes worry about the long-term effects of my medicines

| Completely disagree | Disagree | Neutral | Agree | Completely agree |
| --- | --- | --- | --- | --- |
| ❑ | ❑ | ❑ | ❑ | ❑ |

8. My medicines are a mystery to me

| Completely disagree | Disagree | Neutral | Agree | Completely agree |
| --- | --- | --- | --- | --- |
| ❑ | ❑ | ❑ | ❑ | ❑ |

9. My medicines disrupt my life

| Completely disagree | Disagree | Neutral | Agree | Completely agree |
| --- | --- | --- | --- | --- |
| ❑ | ❑ | ❑ | ❑ | ❑ |

10. I sometimes worry about becoming too dependent on my medicines

| Completely disagree | Disagree | Neutral | Agree | Completely agree |
| --- | --- | --- | --- | --- |
| ❑ | ❑ | ❑ | ❑ | ❑ |

**6. HEALTH-RELATED QUALITY OF LIFE QUESTIONNAIRE: EQ-5D-5L**

**NOTE: In order to evaluate correctly this questionnaire, you must answer all the statements. Please tick one option for each**

MOBILITY

- I have no problems in walking about
- I have slight problems in walking about
- I have moderate problems in walking about
- I have severe problems in walking about
- I am unable to walk about

SELF-CARE

- I have no problems washing or dressing myself
- I have slight problems washing or dressing myself
- I have moderate problems washing or dressing myself
- I have severe problems washing or dressing myself
- I am unable to wash or dress myself

USUAL ACTIVITIES (e.g. work, study, housework, family or leisure activities)

- I have no problems doing my usual activities
- I have slight problems doing my usual activities
- I have moderate problems doing my usual activities
- I have severe problems doing my usual activities
- I am unable to do my usual activities

PAIN / DISCOMFORT

- I have no pain or discomfort
- I have slight pain or discomfort
- I have moderate pain or discomfort
- I have severe pain or discomfort
- I have extreme pain or discomfort

ANXIETY / DEPRESSION

- I am not anxious or depressed
- I am slightly anxious or depressed
- I am moderately anxious or depressed
- I am severely anxious or depressed
- I am extremely anxious or depressed

To help people say how good or bad a health state is, we have drawn a scale (rather like a thermometer) on which the best state you can imagine is marked 100 and the worst state you can imagine is marked 0.

We would like you to indicate on this scale how good or bad your own health is today, in your opinion. Please do this by drawing a line from the box below to whichever point on the scale indicates how good or bad your health state is today.

**Thank you very much for your cooperation and for the time devoted to complete the survey**
